# Supplementary material for: Quercetin Pretreatment Attenuates Hepatic Ischemia Reperfusion-Induced Apoptosis and Autophagy by Inhibiting ERK/NF-κB Pathway
Source: Gastroenterol Res Pract. 2017 Oct 16;2017:9724217. doi: 10.1155/2017/9724217 (PMC5662816; doi:10.1155/2017/9724217)

**Quercetin pretreatment attenuates hepatic ischemia reperfusion-induced apoptosis and autophagy by inhibiting ERK/NF-κB pathway**

**Liwei Wu1,#,Qinghui Zhang2,# ,Weiqi Dai1, Sainan Li1 ,Jiao Feng1,Jingjing Li1,Tong Liu1, Shizan Xu3,Wenwen Wang1,Xiya Lu1,Qiang Yu3,Kan Chen1,Yujing Xia1,Jie Lu1,Yingqun Zhou1,Xiaoming Fan4,*,Chuanyong Guo1,***


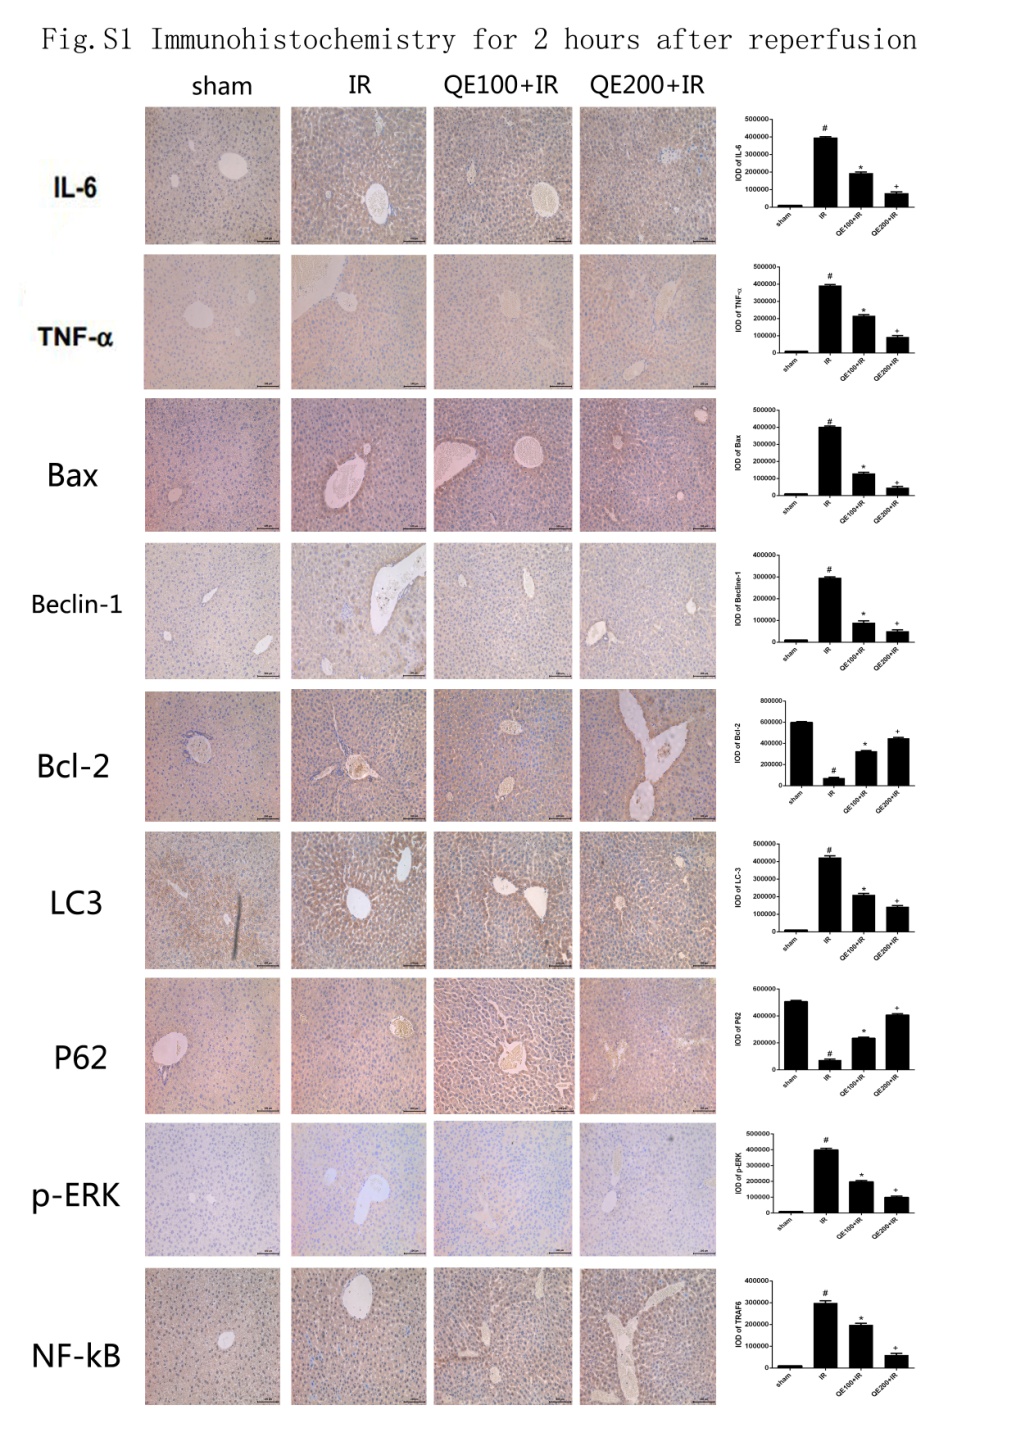

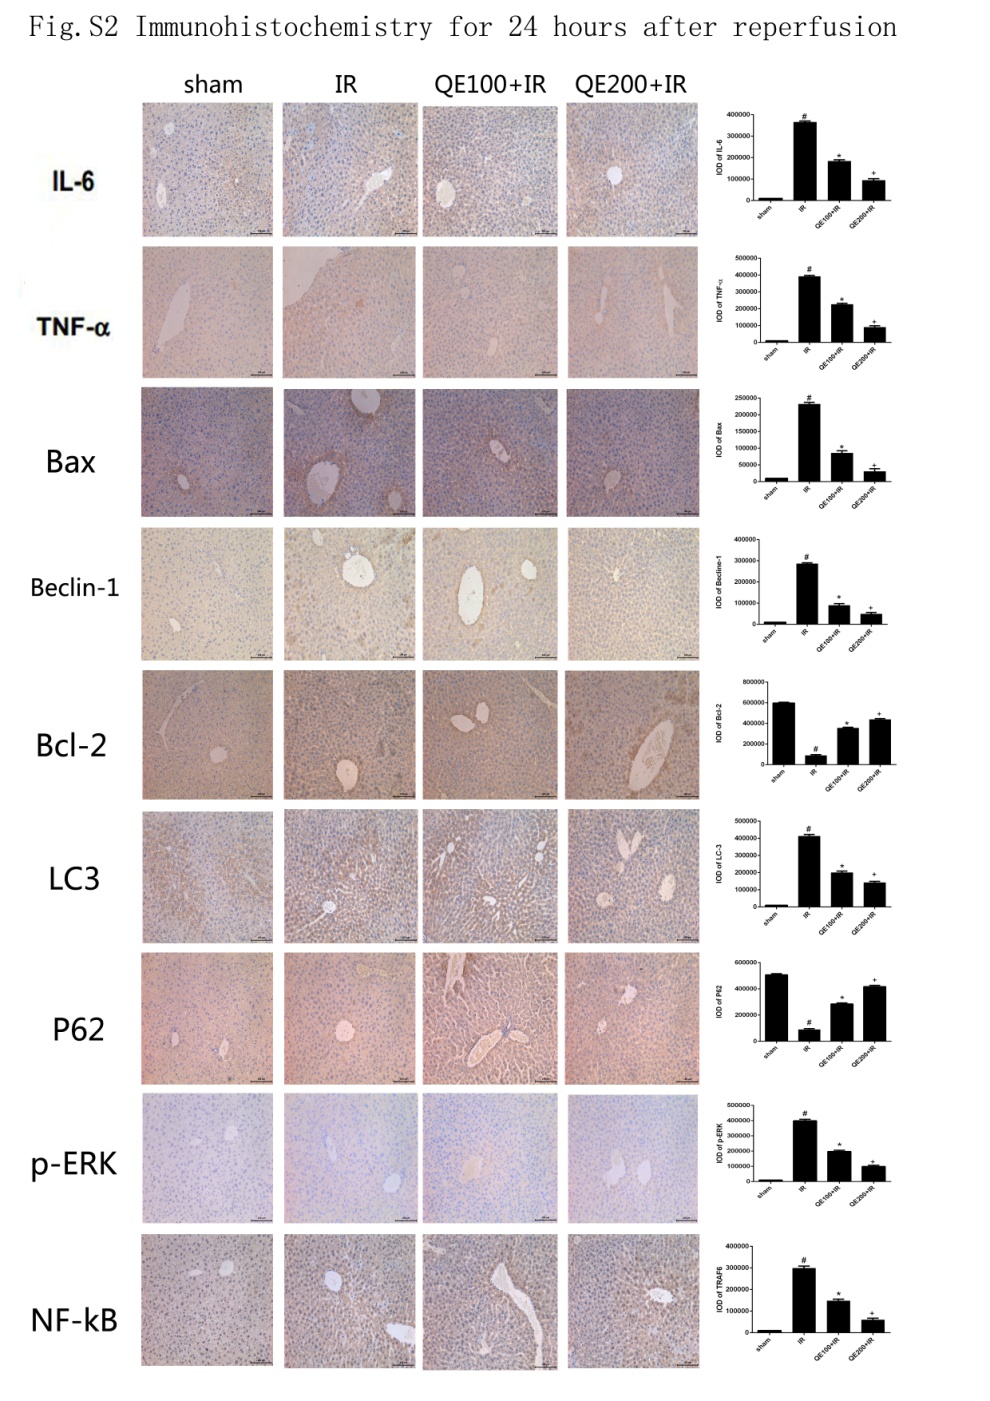

Supplement: Supplementary file 1 — Immunohistochemistry for 2 hours after reperfusion. Immunohistochemistry for 24 hours after reperfusion. [file 9724217.f1.docx]
